# Supplementary material for: Efficacy of Probiotics for Irritable Bowel Syndrome: A Systematic Review and Network Meta-Analysis
Source: PubMed Central journal article supplement (PMC9010660; doi:10.3389/fcimb.2022.859967), 2022-04-01
Supplement: DataSheet_1.pdf [file DataSheet_1.pdf]

**Figure S1**

(a)

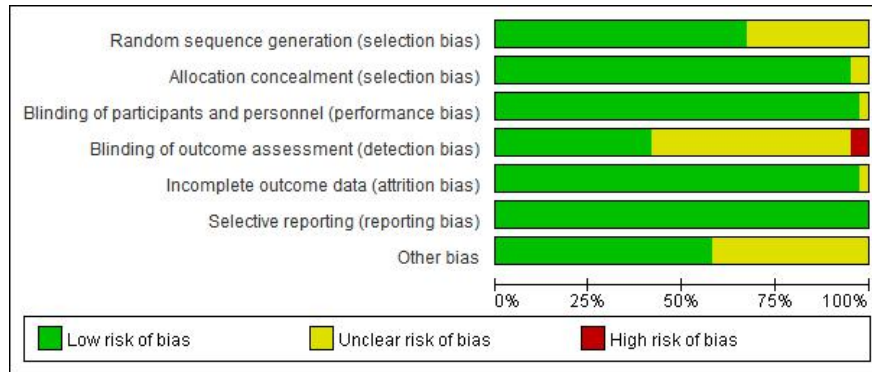

(b)

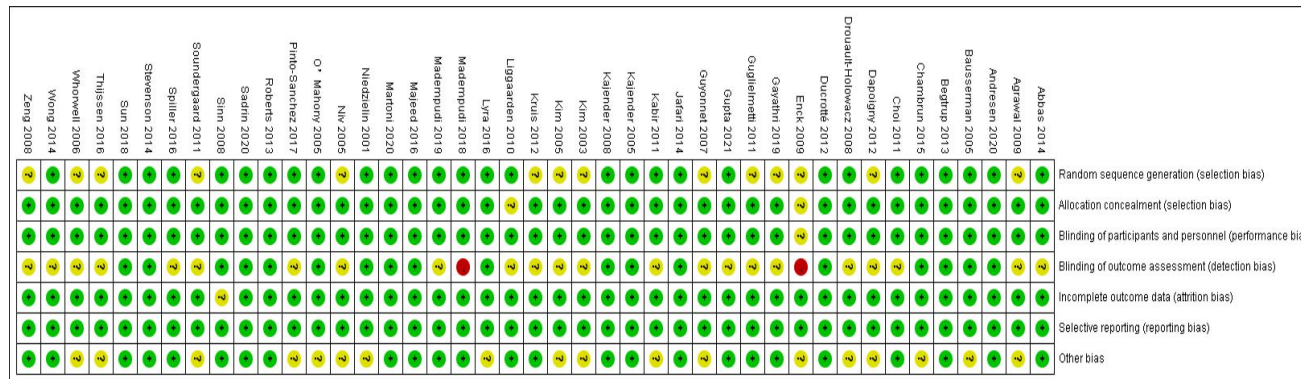

(a) Risk of bias graph: judgements about each risk of bias item presented as percentages across all included studies.

(b) Risk of bias summary: review authors' judgements about each risk of bias item for each included study.

**Figure S2: Forest plot and the global inconsistency test result (symptom relief rate).**  
 ( $\chi^2=1.14$ ,  $p=0.285$ )

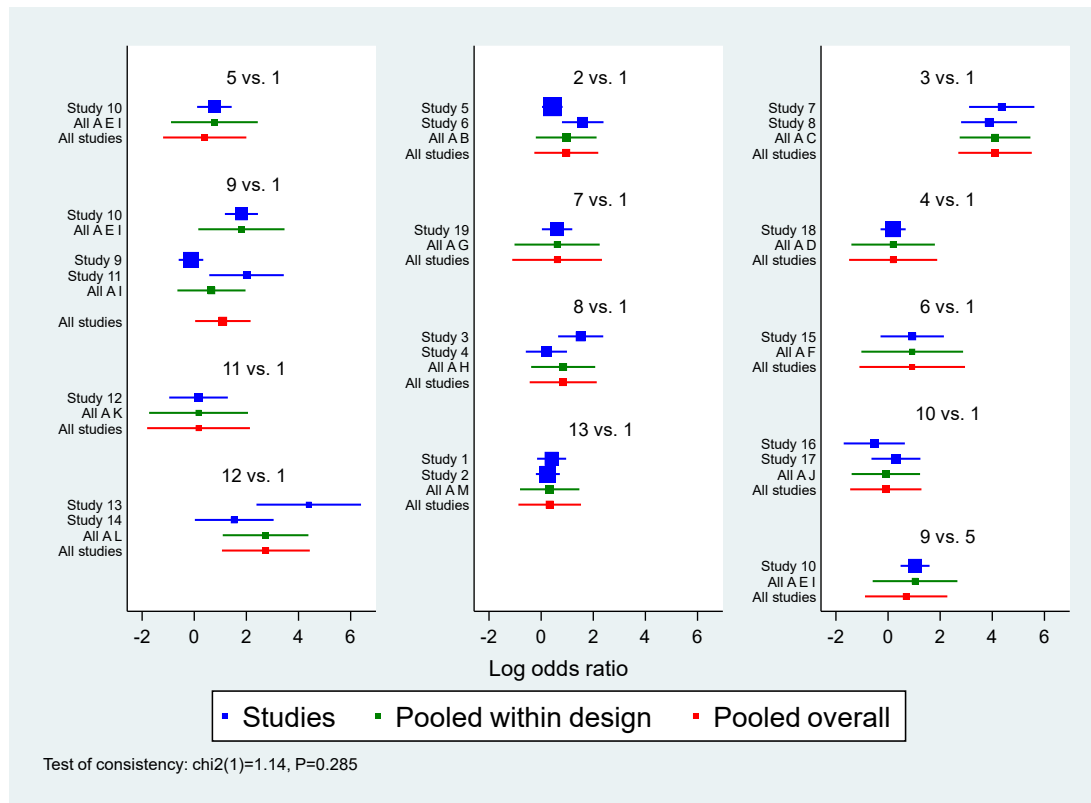

**Label:** PLA=1=A B.bifidum=2=B B.coagulans=3=C B.infantis=4=D B.lactis=5=E B.longum=6=F C.butyricum=7=G E.coli=8=H  
 L.acidophilus=9=I L.casei=10=J L.GG =11=K L.plantarum=12=L S.cerevisiae=13=M

**Table S1: Local inconsistency test (symptom relief rate)**

| Side | Direct   |           | Indirect  |           | Difference |           |       | tau      |
|------|----------|-----------|-----------|-----------|------------|-----------|-------|----------|
|      | Coef.    | Std. Err. | Coef.     | Std. Err. | Coef.      | Std. Err. | P> z  |          |
| AB   | .        | .         | .         | .         | .          | .         | .     | .        |
| AC   | .        | .         | .         | .         | .          | .         | .     | .        |
| AD   | .        | .         | .         | .         | .          | .         | .     | .        |
| AE * | .7726241 | .849371   | -1.526387 | 1.963843  | 2.299011   | 2.151114  | 0.285 | .7793094 |
| AF   | .        | .         | .         | .         | .          | .         | .     | .        |
| AG   | .        | .         | .         | .         | .          | .         | .     | .        |
| AH   | .        | .         | .         | .         | .          | .         | .     | .        |
| AI   | .        | .         | .         | .         | .          | .         | .     | .        |
| AJ   | .        | .         | .         | .         | .          | .         | .     | .        |
| AK   | .        | .         | .         | .         | .          | .         | .     | .        |
| AL   | .        | .         | .         | .         | .          | .         | .     | .        |
| AM   | .        | .         | .         | .         | .          | .         | .     | .        |
| EI * | 1.036593 | .8291856  | -1.262418 | 1.989554  | 2.299011   | 2.151114  | 0.285 | .7793094 |

**Label:** PLA=1=A B.bifidum=2=B B.coagulans=3=C B.infantis=4=D B.lactis=5=E B.longum=6=F C.butyricum=7=G E.coli=8=H  
L.acidophilus=9=I L.casei=10=J L.GG =11=K L.plantarum=12=L S.cerevisiae=13=M

**Table S2: SUCRA analysis: MeanRank table (symptom relief rate)**

| Treatm~t | SUCRA | PrBest | MeanRank |
|----------|-------|--------|----------|
| A        | 21.9  | 0.0    | 10.4     |
| B        | 58.3  | 0.0    | 6.0      |
| C        | 99.0  | 88.6   | 1.1      |
| D        | 33.5  | 0.0    | 9.0      |
| E        | 38.9  | 0.0    | 8.3      |
| F        | 54.4  | 0.4    | 6.5      |
| G        | 45.2  | 0.0    | 7.6      |
| H        | 54.1  | 0.0    | 6.5      |
| I        | 63.2  | 0.0    | 5.4      |
| J        | 22.9  | 0.0    | 10.2     |
| K        | 32.8  | 0.0    | 9.1      |
| L        | 89.6  | 10.9   | 2.2      |
| M        | 36.2  | 0.0    | 8.7      |

**Label:** PLA=1=A B.bifidum=2=B B.coagulans=3=C B.infantis=4=D B.lactis=5=E B.longum=6=F C.butyricum=7=G E.coli=8=H  
L.acidophilus=9=I L.casei=10=J L.GG =11=K L.plantarum=12=L S.cerevisiae=13=M

**Figure S3: SUCRA analysis: MeanRank figure (symptom relief)**

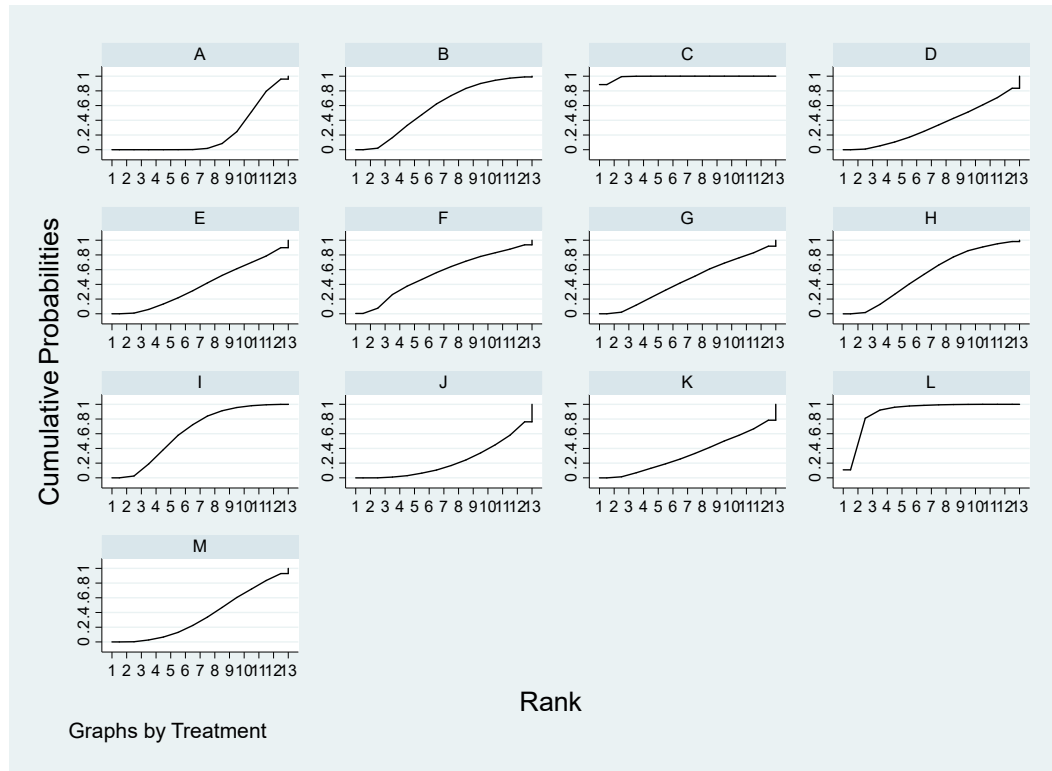

**Label:** PLA=1=A B.bifidum=2=B B.coagulans=3=C B.infantis=4=D B.lactis=5=E B.longum=6=F C.butyricum=7=G E.coli=8=H  
 L.acidophilus=9=I L.casei=10=J L.GG =11=K L.plantarum=12=L S.cerevisiae=13=M

**Figure S4: Forest plot and the global inconsistency test result (global symptom scores).**  
 ( $\chi^2=3.90$ ,  $p=0.048$ )

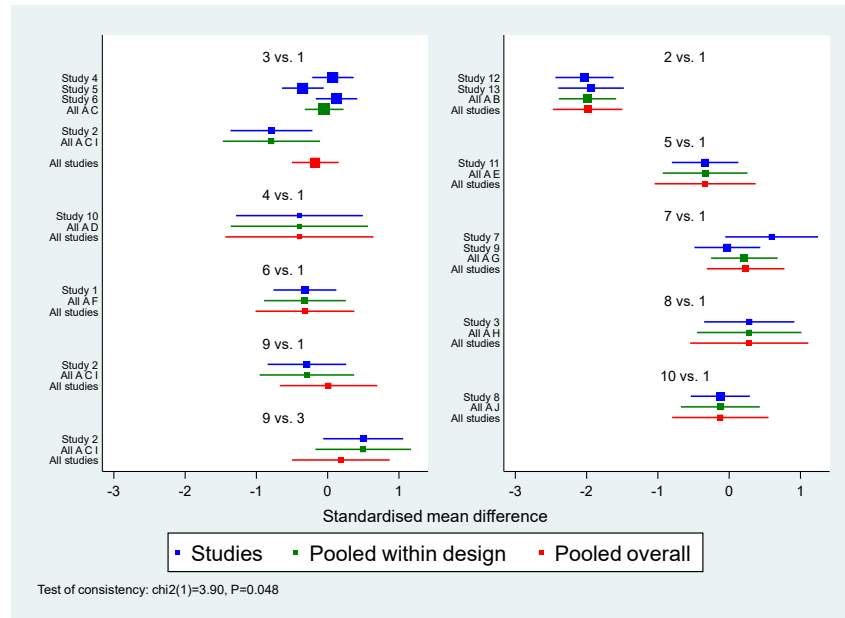

**Label:** PLA=1=A B.coagulans=2=B B.infantis=3=C B.longum =4=D C.butyricum=5=E L.acidophilus=6=F L.plantarum=7=G L.reuteri=8=H  
 L.salivarius=9=I S.bouardii=10=J

**Table S3: Local inconsistency test (global symptom score)**

| Side  | Direct    |           | Indirect  |           | Difference |           | P> z         | tau      |
|-------|-----------|-----------|-----------|-----------|------------|-----------|--------------|----------|
|       | Coef.     | Std. Err. | Coef.     | Std. Err. | Coef.      | Std. Err. |              |          |
| A B   | .         | .         | .         | .         | .          | .         | .            | .        |
| A C   | .         | .         | .         | .         | .          | .         | .            | .        |
| A D   | .         | .         | .         | .         | .          | .         | .            | .        |
| A E   | .         | .         | .         | .         | .          | .         | .            | .        |
| A F   | .         | .         | .         | .         | .          | .         | .            | .        |
| A G   | .         | .         | .         | .         | .          | .         | .            | .        |
| A H   | .         | .         | .         | .         | .          | .         | .            | .        |
| A I * | -.2907251 | .3380839  | 1.188604  | .6626518  | -1.479329  | .7495419  | <b>0.048</b> | .1877169 |
| A J   | .         | .         | .         | .         | .          | .         | .            | .        |
| C I * | .4983858  | .3422479  | -.9809432 | .6562077  | 1.479329   | .7495419  | <b>0.048</b> | .1877169 |

**Label:** PLA=1=A B.coagulans=2=B B.infantis=3=C B.longum =4=D C.butyricum=5=E L.acidophilus=6=F L.plantarum=7=G L.reuteri=8=H  
L.salivarius=9=I S.boulardii=10=J

**Table S4: SUCRA analysis: MeanRank table (global symptom score)**

| Treatm~t | SUCRA | PrBest | MeanRank |
|----------|-------|--------|----------|
| A        | 32.5  | 0.0    | 7.1      |
| B        | 100.0 | 99.9   | 1.0      |
| C        | 39.3  | 0.0    | 6.5      |
| D        | 63.1  | 0.1    | 4.3      |
| E        | 63.5  | 0.0    | 4.3      |
| F        | 62.5  | 0.0    | 4.4      |
| G        | 16.7  | 0.0    | 8.5      |
| H        | 17.4  | 0.0    | 8.4      |
| I        | 59.2  | 0.0    | 4.7      |
| J        | 45.8  | 0.0    | 5.9      |

**Label:** PLA=1=A B.coagulans=2=B B.infantis=3=C B.longum =4=D C.butyricum=5=E L.acidophilus=6=F L.plantarum=7=G L.reuteri=8=H  
L.salivarius=9=I S.boulardii=10=J



**Figure S5: SUCRA analysis: MeanRank figure (global symptom score)**

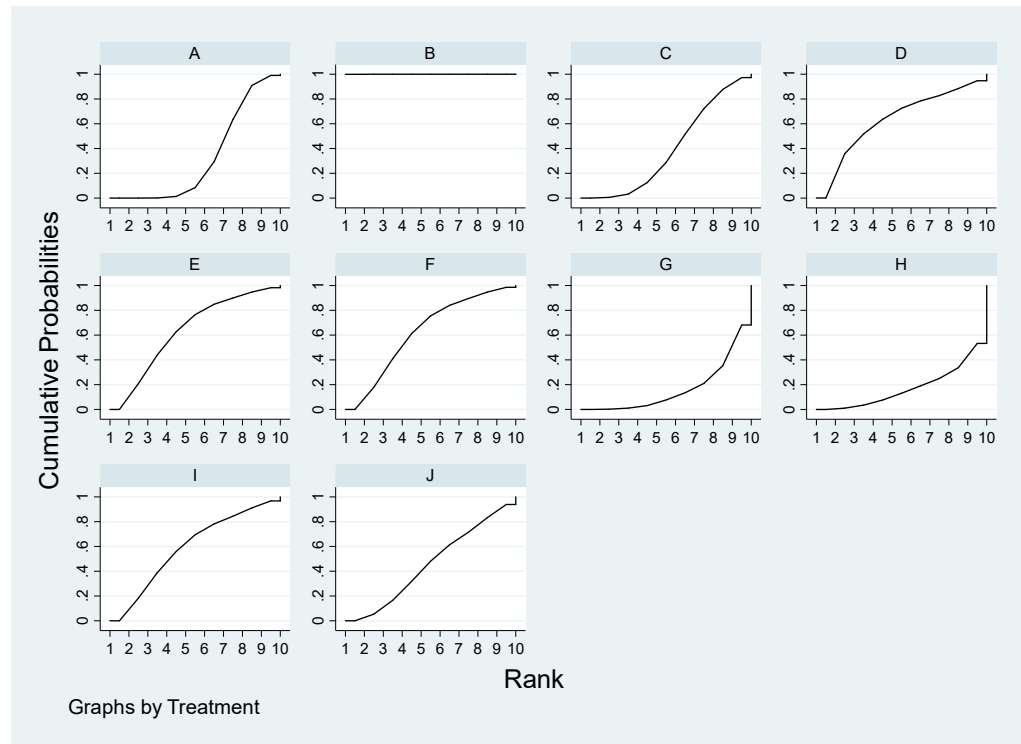

**Label:** PLA=1=A B.coagulans=2=B B.infantis=3=C B.longum =4=D C.butyricum=5=E L.acidophilus=6=F L.plantarum=7=G L.reuteri=8=H  
L.salivarius=9=I S.boulardii=10=J

**Figure S6: Forest plot and the global inconsistency test result (Abdominal pain).**  
 ( $\chi^2=1.28$ ,  $p=0.258$ )

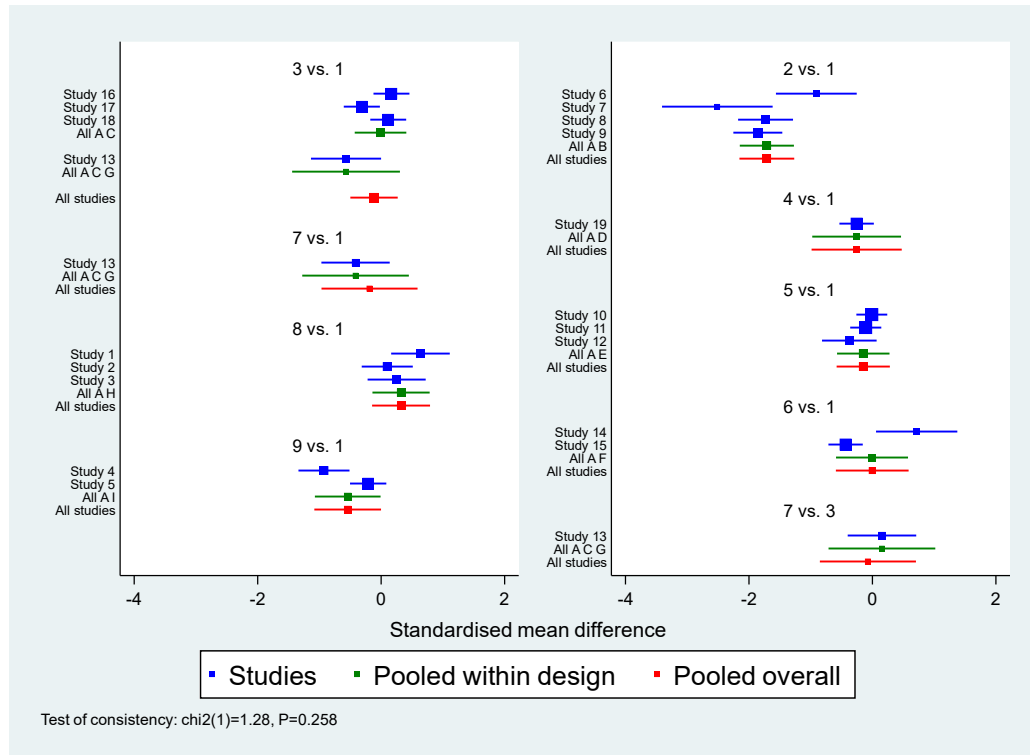

**Label:** PLA=1=A   B.coagulans=2=B   B.infantis=3=C   C.butyricum=4=D   L.acidophilus=5=E   L.plantarum=6=F   L.salivarius=7=G  
 S.bouardii=8=H   S.cerevisiae=9=I

**Table S5: Local inconsistency test (Abdominal pain)**

|       | Coef.     | Side<br>Std. Err. | Direct<br>Coef. | Std. Err. | Indirect<br>Coef. | Std. Err. | P> z  | Difference | tau |
|-------|-----------|-------------------|-----------------|-----------|-------------------|-----------|-------|------------|-----|
| A B   | .         |                   | .               |           | .                 |           | .     | .          | .   |
| A C   | .         |                   | .               |           | .                 |           | .     | .          | .   |
| A D   | .         |                   | .               |           | .                 |           | .     | .          | .   |
| A E   | .         |                   | .               |           | .                 |           | .     | .          | .   |
| A F   | .         |                   | .               |           | .                 |           | .     | .          | .   |
| A G * | -.4148299 | .4404527          | .702524         | .8795925  | -1.117354         | .9874351  | 0.258 | .338101    |     |
| A H   | .         |                   | .               |           | .                 |           | .     | .          | .   |
| A I   | .         |                   | .               |           | .                 |           | .     | .          | .   |
| C G * | .1541163  | .4411457          | -.9632376       | .87855    | 1.117354          | .987435   | 0.258 | .338101    |     |

**Label:** PLA=1=A B.coagulans=2=B B.infantis=3=C C.butyricum=4=D L.acidophilus=5=E L.plantarum=6=F L.salivarius=7=G  
S.bouardii=8=H S.cerevisiae=9=I

**Table S6: SUCRA analysis: MeanRank table (Abdominal pain)**

| Treatm~t | SUCRA | PrBest | MeanRank |
|----------|-------|--------|----------|
| A        | 31.7  | 0.0    | 6.5      |
| B        | 100.0 | 99.8   | 1.0      |
| C        | 45.6  | 0.0    | 5.4      |
| D        | 55.4  | 0.1    | 4.6      |
| E        | 48.2  | 0.0    | 5.1      |
| F        | 34.7  | 0.0    | 6.2      |
| G        | 49.7  | 0.1    | 5.0      |
| H        | 8.2   | 0.0    | 8.3      |
| I        | 76.6  | 0.0    | 2.9      |

**Label:** PLA=1=A B.coagulans=2=B B.infantis=3=C C.butyricum=4=D L.acidophilus=5=E L.plantarum=6=F L.salivarius=7=G  
S.boulardii=8=H S.cerevisiae=9=I

**Figure S7: SUCRA analysis: MeanRank figure (Abdominal pain)**

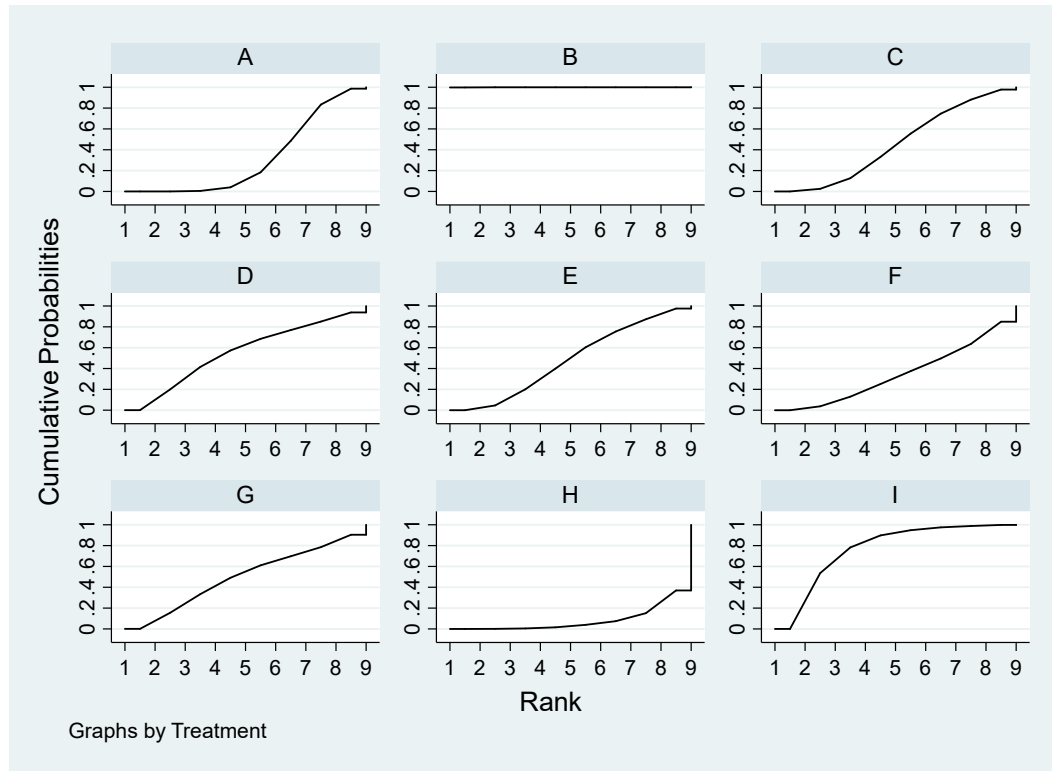

**Label:** PLA=1=A B.coagulans=2=B B.infantis=3=C C.butyricum=4=D L.acidophilus=5=E L.plantarum=6=F L.salivarius=7=G  
S.bouardii=8=H S.cerevisiae=9=I

**Figure S8: Forest plot and the global inconsistency test result (Abdominal pain+treatment length).**  
 ( $\chi^2=0.51$ ,  $p=0.475$ )

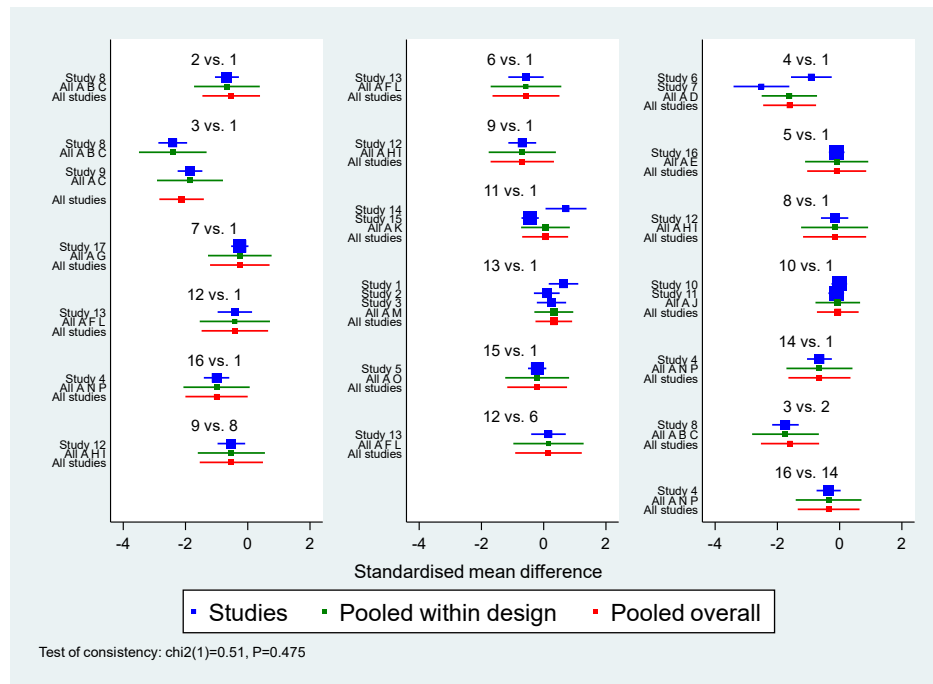

**Label:** PLA=1=A    B.coagulans(4w)=2=B    B.coagulans(8w)=3=C    B.coagulans(11w/13W)=4=D    B.infantis(4w)=5=E    B.infantis(8w)=6=F  
 C.butyricum(4w)=7=G    L.acidophilus(4w)=8=H    L.acidophilus(8w)=9=I    L.acidophilus(12w)=10=J    L.plantarum(3w/4W)=11=K  
 L.salivarius(8w)=12=L    S.boulardii(4w/6w)=13=M    S.cerevisiae(4w)=14=N    S.cerevisiae(8w)=15=O    S.cerevisiae(10w)=16=P

**Table S7: Local inconsistency test (Abdominal pain+treatment length).**

| Side  | Direct    |           | Indirect  |           | Difference |           |       | P> z     | tau |
|-------|-----------|-----------|-----------|-----------|------------|-----------|-------|----------|-----|
|       | Coef.     | Std. Err. | Coef.     | Std. Err. | Coef.      | Std. Err. |       |          |     |
| A B * | -.6693619 | .5385393  | .4372391  | 1.446432  | -1.106601  | 1.54874   | 0.475 | .5015388 |     |
| A C   | .         | .         | .         | .         | .          | .         | .     | .        |     |
| A D   | .         | .         | .         | .         | .          | .         | .     | .        |     |
| A E   | .         | .         | .         | .         | .          | .         | .     | .        |     |
| A F   | .         | .         | .         | .         | .          | .         | .     | .        |     |
| A G   | .         | .         | .         | .         | .          | .         | .     | .        |     |
| A H   | .         | .         | .         | .         | .          | .         | .     | .        |     |
| A I   | .         | .         | .         | .         | .          | .         | .     | .        |     |
| A J   | .         | .         | .         | .         | .          | .         | .     | .        |     |
| A K   | .         | .         | .         | .         | .          | .         | .     | .        |     |
| A L   | .         | .         | .         | .         | .          | .         | .     | .        |     |
| A M   | .         | .         | .         | .         | .          | .         | .     | .        |     |
| A N   | .         | .         | .         | .         | .          | .         | .     | .        |     |
| A O   | .         | .         | .         | .         | .          | .         | .     | .        |     |
| A P   | .         | .         | .         | .         | .          | .         | .     | .        |     |
| B C * | -1.740341 | .5467806  | -.6337399 | 1.437127  | -1.106601  | 1.54874   | 0.475 | .5015388 |     |
| F L   | .         | .         | .         | .         | .          | .         | .     | .        |     |
| H I   | .         | .         | .         | .         | .          | .         | .     | .        |     |
| N P   | .         | .         | .         | .         | .          | .         | .     | .        |     |

**Label:** PLA=1=A    B.coagulans(4w)=2=B    B.coagulans(8w)=3=C    B.coagulans(11w/13W)=4=D    B.infantis(4w)=5=E    B.infantis(8w)=6=F  
 C.butyricum(4w)=7=G    L.acidophilus(4w)=8=H    L.acidophilus(8w)=9=I    L.acidophilus(12w)=10=J    L.plantarum(3w/4W)=11=K  
 L.salivarius(8w)=12=L    S.boulardii(4w/6w)=13=M    S.cerevisiae(4w)=14=N    S.cerevisiae(8w)=15=O    S.cerevisiae(10w)=16=P

**Table S8: SUCRA analysis: MeanRank table (Abdominal pain+treatment length).**

| Treatment | SUCRA | PrBest | MeanRank |
|-----------|-------|--------|----------|
| A         | 26.6  | 0.0    | 12.0     |
| B         | 56.0  | 0.0    | 7.6      |
| C         | 98.2  | 77.7   | 1.3      |
| D         | 90.5  | 17.8   | 2.4      |
| E         | 33.6  | 0.0    | 11.0     |
| F         | 57.8  | 0.5    | 7.3      |
| G         | 42.7  | 0.1    | 9.6      |
| H         | 37.2  | 0.0    | 10.4     |
| I         | 62.5  | 0.7    | 6.6      |
| J         | 31.7  | 0.0    | 11.2     |
| K         | 25.9  | 0.0    | 12.1     |
| L         | 50.0  | 0.3    | 8.5      |
| M         | 11.6  | 0.0    | 14.3     |
| N         | 60.5  | 0.3    | 6.9      |
| O         | 39.8  | 0.0    | 10.0     |
| P         | 75.3  | 2.7    | 4.7      |

**Label:** PLA=1=A    B.coagulans(4w)=2=B    B.coagulans(8w)=3=C    B.coagulans(11w/13W)=4=D    B.infantis(4w)=5=E    B.infantis(8w)=6=F  
 C.butyricum(4w)=7=G    L.acidophilus(4w)=8=H    L.acidophilus(8w)=9=I    L.acidophilus(12w)=10=J    L.plantarum(3w/4W)=11=K  
 L.salivarius(8w)=12=L    S.boulardii(4w/6w)=13=M    S.cerevisiae(4w)=14=N    S.cerevisiae(8w)=15=O    S.cerevisiae(10w)=16=P



**Figure S9: SUCRA analysis: MeanRank figure (Abdominal pain+treatment length).**

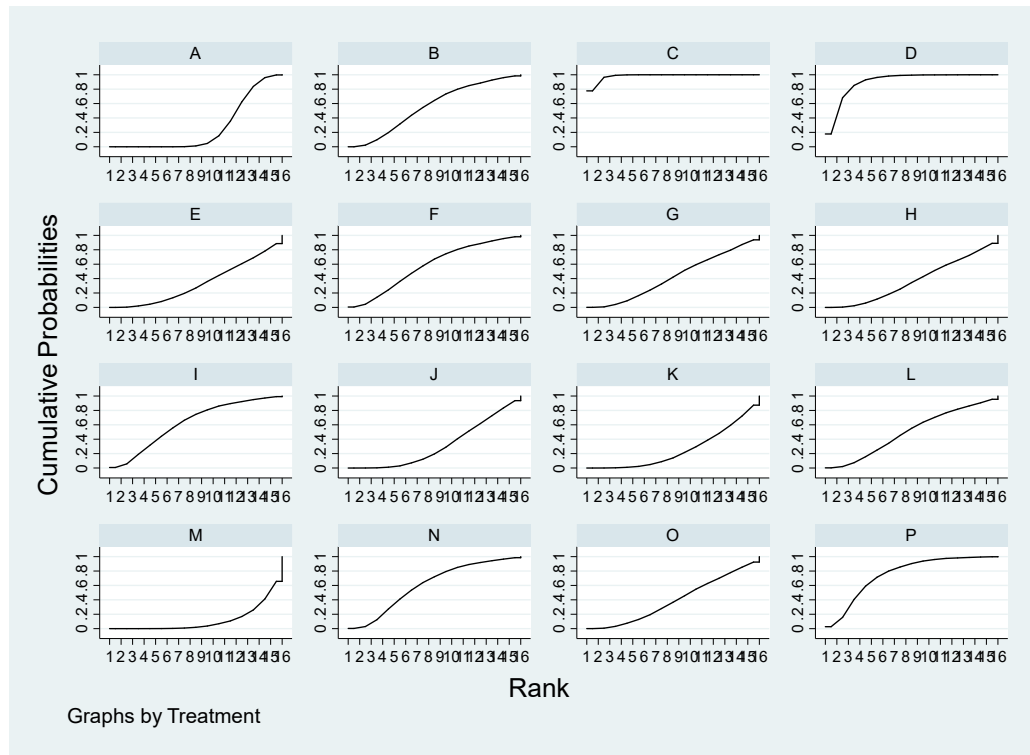

**Label:** PLA=1=A    B.coagulans(4w)=2=B    B.coagulans(8w)=3=C    B.coagulans(11w/13W)=4=D    B.infantis(4w)=5=E    B.infantis(8w)=6=F  
 C.butyricum(4w)=7=G    L.acidophilus(4w)=8=H    L.acidophilus(8w)=9=I    L.acidophilus(12w)=10=J    L.plantarum(3w/4W)=11=K  
 L.salivarius(8w)=12=L    S.bouardii(4w/6w)=13=M    S.cerevisiae(4w)=14=N    S.cerevisiae(8w)=15=O    S.cerevisiae(10w)=16=P

**Table S9: League table (Abdominal pain+treatment length).**

| <b>B.coagulans(8w)</b>     | <b>B.coagulans(11w/13w)</b> | <b>S.cerevisiae(10w)</b>   | <b>L.acidophilus(8w)</b> | <b>S.cerevisiae(4w)</b> | <b>B.infantis(8w)</b> | <b>B.coagulans(4w)</b> | <b>L.salivarius(8w)</b> |
|----------------------------|-----------------------------|----------------------------|--------------------------|-------------------------|-----------------------|------------------------|-------------------------|
| -0.52 (-1.63,0.59)         | -0.60 (-1.92,0.71)          | -0.31 (-1.74,1.11)         | -0.04 (-1.46,1.39)       | -0.08 (-1.55,1.39)      | -0.04 (-1.46,1.38)    | -0.12 (-1.53,1.30)     | -0.16 (-1.59,1.27)      |
| -1.12 (-2.35,0.11)         | -0.92 (-2.24,0.41)          | -0.35 (-1.35,0.64)         | -0.12 (-1.60,1.36)       | -0.12 (-1.48,1.24)      | -0.15 (-1.22,0.92)    | -0.28 (-1.61,1.05)     | -0.20 (-1.64,1.23)      |
| <b>-1.44 (-2.68,-0.19)</b> | -0.96 (-2.27,0.35)          | -0.43 (-1.90,1.04)         | -0.16 (-1.53,1.22)       | -0.12 (-1.48,1.24)      | -0.31 (-1.75,1.13)    | -0.32 (-1.66,1.01)     | -0.25 (-1.73,1.22)      |
| <b>-1.48 (-2.70,-0.25)</b> | -1.04 (-2.41,0.33)          | -0.47 (-1.83,0.89)         | -0.27 (-1.75,1.20)       | -0.39 (-1.77,0.99)      | -0.36 (-1.80,1.08)    | -0.37 (-1.74,1.00)     | -0.32 (-1.75,1.11)      |
| <b>-1.56 (-2.85,-0.26)</b> | -1.07 (-2.33,0.18)          | -0.59 (-2.05,0.88)         | -0.43 (-1.83,0.96)       | -0.44 (-1.82,0.95)      | -0.41 (-1.89,1.07)    | -0.44 (-1.76,0.89)     | -0.36 (-1.62,0.91)      |
| <b>-1.59 (-2.53,-0.66)</b> | -1.19 (-2.56,0.17)          | -0.75 (-2.13,0.64)         | -0.48 (-1.88,0.92)       | -0.49 (-1.91,0.93)      | -0.47 (-1.91,0.96)    | -0.47 (-1.62,0.67)     | -0.41 (-1.48,0.65)      |
| <b>-1.71 (-3.00,-0.43)</b> | <b>-1.35 (-2.63,-0.07)</b>  | -0.79 (-2.18,0.59)         | -0.53 (-1.54,0.49)       | -0.55 (-1.93,0.82)      | -0.51 (-1.78,0.76)    | -0.53 (-1.46,0.39)     | -0.46 (-1.76,0.84)      |
| <b>-1.87 (-3.06,-0.68)</b> | <b>-1.40 (-2.68,-0.11)</b>  | -0.84 (-2.27,0.58)         | -0.59 (-1.98,0.80)       | -0.59 (-1.79,0.61)      | -0.57 (-1.65,0.51)    | -0.58 (-1.76,0.61)     | -0.74 (-1.96,0.48)      |
| <b>-1.92 (-3.11,-0.72)</b> | <b>-1.45 (-2.77,-0.12)</b>  | -0.91 (-2.29,0.47)         | -0.69 (-1.71,0.33)       | -0.65 (-1.65,0.35)      | -0.62 (-1.92,0.69)    | -0.86 (-1.95,0.24)     |                         |
| <b>-1.96 (-3.20,-0.72)</b> | <b>-1.51 (-2.78,-0.24)</b>  | -0.94 (-2.15,0.26)         | -0.74 (-1.99,0.52)       | -0.70 (-1.94,0.55)      |                       |                        |                         |
| <b>-2.03 (-3.22,-0.84)</b> | <b>-1.55 (-2.63,-0.46)</b>  | <b>-1.00 (-2.00,-0.00)</b> | -1.01 (-2.19,0.16)       | -0.97 (-2.13,0.18)      |                       |                        |                         |
| <b>-2.07 (-3.05,-1.09)</b> | <b>-1.61 (-2.46,-0.76)</b>  | -1.05 (-2.29,0.19)         |                          |                         |                       |                        |                         |
| <b>-2.13 (-2.84,-1.41)</b> | <b>-1.65 (-2.79,-0.52)</b>  | <b>-1.33 (-2.49,-0.17)</b> |                          |                         |                       |                        |                         |
| <b>-2.17 (-3.20,-1.14)</b> | <b>-1.93 (-2.97,-0.90)</b>  |                            |                          |                         |                       |                        |                         |
| <b>-2.45 (-3.38,-1.52)</b> |                             |                            |                          |                         |                       |                        |                         |

|                        |                         |                          |                       |                           |                    |                           |                           |
|------------------------|-------------------------|--------------------------|-----------------------|---------------------------|--------------------|---------------------------|---------------------------|
| <b>C.butyricum(4w)</b> |                         |                          |                       |                           |                    |                           |                           |
| -0.05 (-1.40,1.31)     | <b>S.cerevisiae(8w)</b> |                          |                       |                           |                    |                           |                           |
| -0.09 (-1.49,1.30)     | -0.05 (-1.45,1.35)      | <b>L.acidophilus(4w)</b> |                       |                           |                    |                           |                           |
| -0.16 (-1.51,1.19)     | -0.11 (-1.46,1.23)      | -0.07 (-1.45,1.32)       | <b>B.infantis(4w)</b> |                           |                    |                           |                           |
| -0.20 (-1.36,0.97)     | -0.15 (-1.32,1.02)      | -0.10 (-1.32,1.11)       | -0.04 (-1.20,1.13)    | <b>L.acidophilus(12w)</b> |                    |                           |                           |
| -0.26 (-1.21,0.70)     | -0.21 (-1.17,0.75)      | -0.16 (-1.18,0.85)       | -0.10 (-1.04,0.85)    | -0.06 (-0.73,0.61)        | <b>PLA</b>         |                           |                           |
| -0.30 (-1.51,0.90)     | -0.26 (-1.47,0.95)      | -0.21 (-1.46,1.05)       | -0.14 (-1.34,1.06)    | -0.11 (-1.10,0.89)        | -0.05 (-0.79,0.69) | <b>L.plantarum(3w/4w)</b> |                           |
| -0.58 (-1.70,0.54)     | -0.53 (-1.66,0.59)      | -0.49 (-1.66,0.69)       | -0.42 (-1.54,0.70)    | -0.38 (-1.28,0.51)        | -0.32 (-0.91,0.26) | -0.28 (-1.22,0.67)        | <b>S.boulardii(4w/6w)</b> |

**Figure S10: Forest plot and the global inconsistency test result (Abdominal bloating).**  
 ( $\chi^2=0.65$ ,  $p=0.420$ )

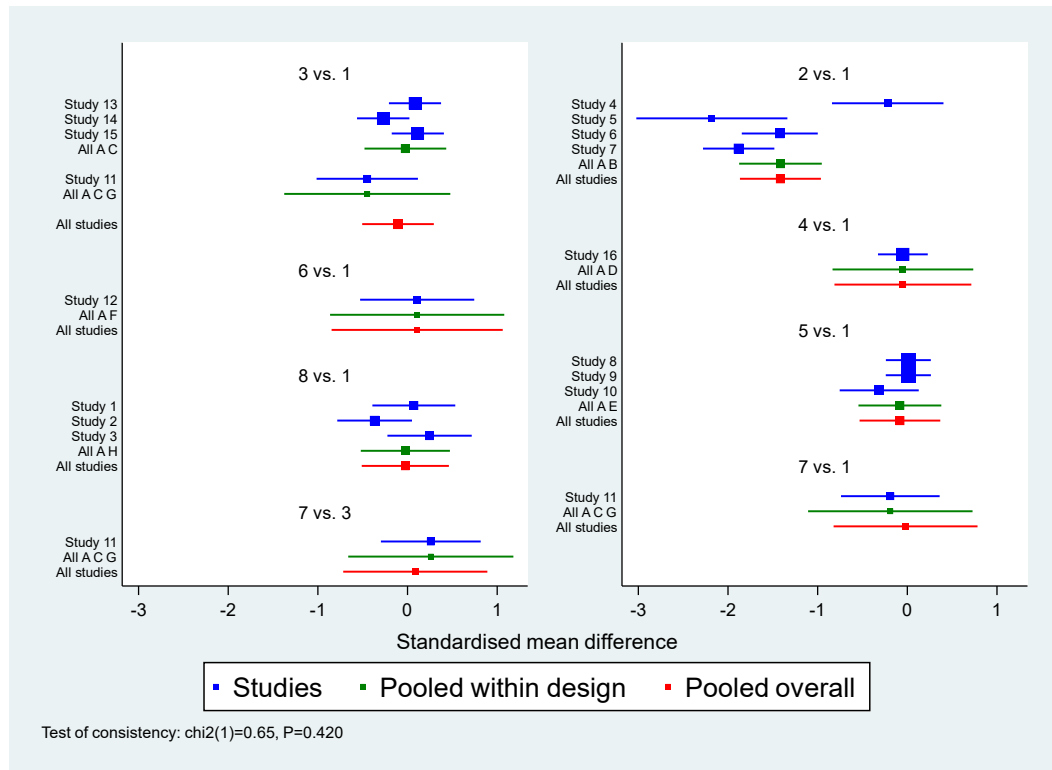

**Label:** PLA=1=A B.coagulans=2=B B.infantis=3=C C.butyricum=4=D L.acidophilus=5=E L.plantarum=6=F L.salivarius=7=G  
 S.bouardii=8=H

**Table S10: Local inconsistency test (Abdominal bloating).**

|       | Side      | Direct    |           | Indirect  |           | Difference |       | tau      |
|-------|-----------|-----------|-----------|-----------|-----------|------------|-------|----------|
|       | Coef.     | Std. Err. | Coef.     | Std. Err. | Coef.     | Std. Err.  | P> z  |          |
| A B   | .         | .         | .         | .         | .         | .          | .     | .        |
| A C   | .         | .         | .         | .         | .         | .          | .     | .        |
| A D   | .         | .         | .         | .         | .         | .          | .     | .        |
| A E   | .         | .         | .         | .         | .         | .          | .     | .        |
| A F   | .         | .         | .         | .         | .         | .          | .     | .        |
| A G * | -.1894072 | .4679005  | .6602016  | .9411275  | -.8496088 | 1.053394   | 0.420 | .3744517 |
| A H   | .         | .         | .         | .         | .         | .          | .     | .        |
| C G * | .2596367  | .469917   | -.5899721 | .9381086  | .8496088  | 1.053394   | 0.420 | .3744517 |

**Label:** PLA=1=A B.coagulans=2=B B.infantis=3=C C.butyricum=4=D L.acidophilus=5=E L.plantarum=6=F L.salivarius=7=G  
S.bouardii=8=H

**Table S11: SUCRA analysis: MeanRank table (Abdominal bloating).**

| Treatm~t | SUCRA | PrBest | MeanRank |
|----------|-------|--------|----------|
| A        | 38.1  | 0.0    | 5.3      |
| B        | 99.9  | 99.6   | 1.0      |
| C        | 51.7  | 0.0    | 4.4      |
| D        | 44.2  | 0.1    | 4.9      |
| E        | 48.1  | 0.0    | 4.6      |
| F        | 33.7  | 0.2    | 5.6      |
| G        | 41.6  | 0.1    | 5.1      |
| H        | 42.7  | 0.0    | 5.0      |

**Label:** PLA=1=A B.coagulans=2=B B.infantis=3=C C.butyricum=4=D L.acidophilus=5=E L.plantarum=6=F L.salivarius=7=G  
S.boulardii=8=H

**Figure S11: SUCRA analysis: MeanRank figure (Abdominal bloating).**

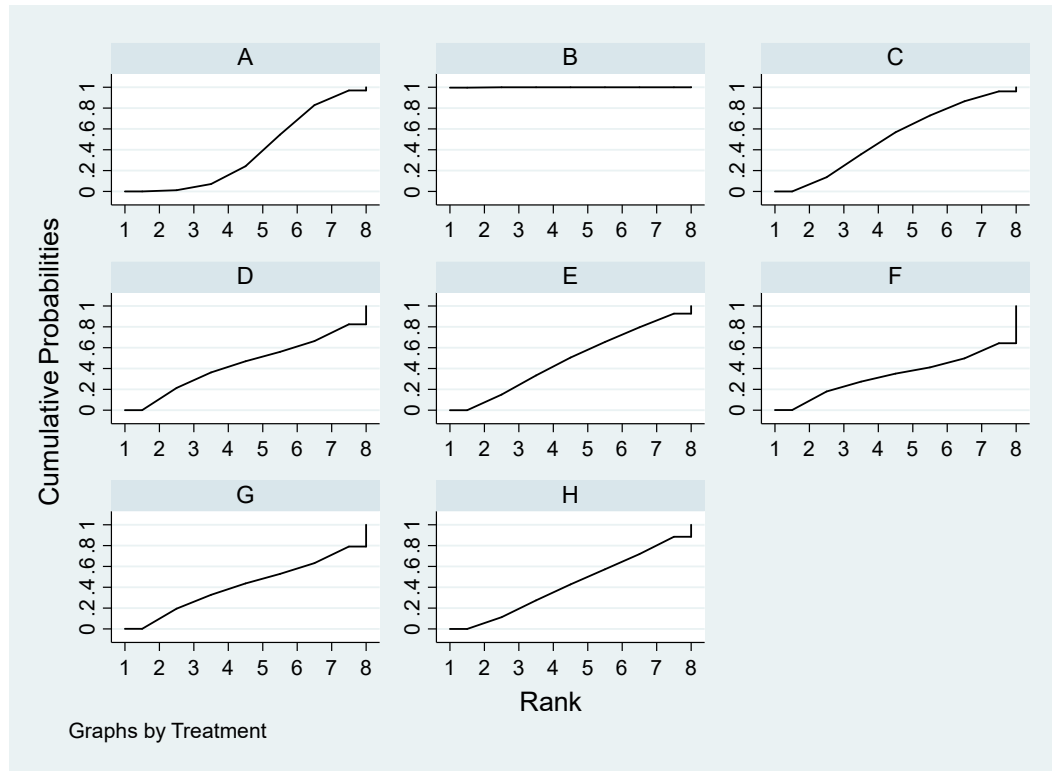

**Label:** PLA=1=A B.coagulans=2=B B.infantis=3=C C.butyricum=4=D L.acidophilus=5=E L.plantarum=6=F L.salivarius=7=G S.bouardii=8=H

**Table S12:** League table (**Abdominal bloating**).

|                     |                    |                      |                    |                    |                     |                    |                    |  |  |
|---------------------|--------------------|----------------------|--------------------|--------------------|---------------------|--------------------|--------------------|--|--|
| <b>B.coagulans</b>  |                    |                      |                    |                    |                     |                    |                    |  |  |
| -1.31 (-1.91,-0.71) | <b>B.infantis</b>  |                      |                    |                    |                     |                    |                    |  |  |
| -1.33 (-1.97,-0.69) | -0.02 (-0.62,0.58) | <b>L.acidophilus</b> |                    |                    |                     |                    |                    |  |  |
| -1.37 (-2.25,-0.48) | -0.06 (-0.92,0.80) | -0.03 (-0.92,0.85)   | <b>C.butyricum</b> |                    |                     |                    |                    |  |  |
| -1.39 (-2.05,-0.73) | -0.08 (-0.71,0.55) | -0.06 (-0.72,0.60)   | -0.02 (-0.93,0.88) | <b>S.boulardii</b> |                     |                    |                    |  |  |
| -1.40 (-2.32,-0.47) | -0.09 (-0.89,0.72) | -0.06 (-0.98,0.86)   | -0.03 (-1.14,1.08) | -0.01 (-0.94,0.93) | <b>L.salivarius</b> |                    |                    |  |  |
| -1.42 (-1.87,-0.96) | -0.11 (-0.51,0.29) | -0.08 (-0.53,0.37)   | -0.05 (-0.81,0.71) | -0.02 (-0.51,0.46) | -0.02 (-0.82,0.78)  | <b>PLA</b>         |                    |  |  |
| -1.52 (-2.58,-0.47) | -0.21 (-1.25,0.82) | -0.19 (-1.25,0.87)   | -0.16 (-1.38,1.07) | -0.13 (-1.20,0.94) | -0.13 (-1.37,1.12)  | -0.11 (-1.06,0.85) | <b>L.plantarum</b> |  |  |



**Table S13: SUCRA analysis: MeanRank table (Straining).**

| Treatm~t | SUCRA | PrBest | MeanRank |
|----------|-------|--------|----------|
| A        | 17.7  | 0.0    | 4.3      |
| B        | 99.9  | 99.5   | 1.0      |
| C        | 49.5  | 0.0    | 3.0      |
| D        | 43.9  | 0.5    | 3.2      |
| E        | 39.0  | 0.0    | 3.4      |

**Label:** PLA=1=A B.coagulans=2=B B.infantis=3=C L.plantarum=4=D S.boulardii=5=E

**Figure S12: SUCRA analysis: MeanRank figure (Straining).**

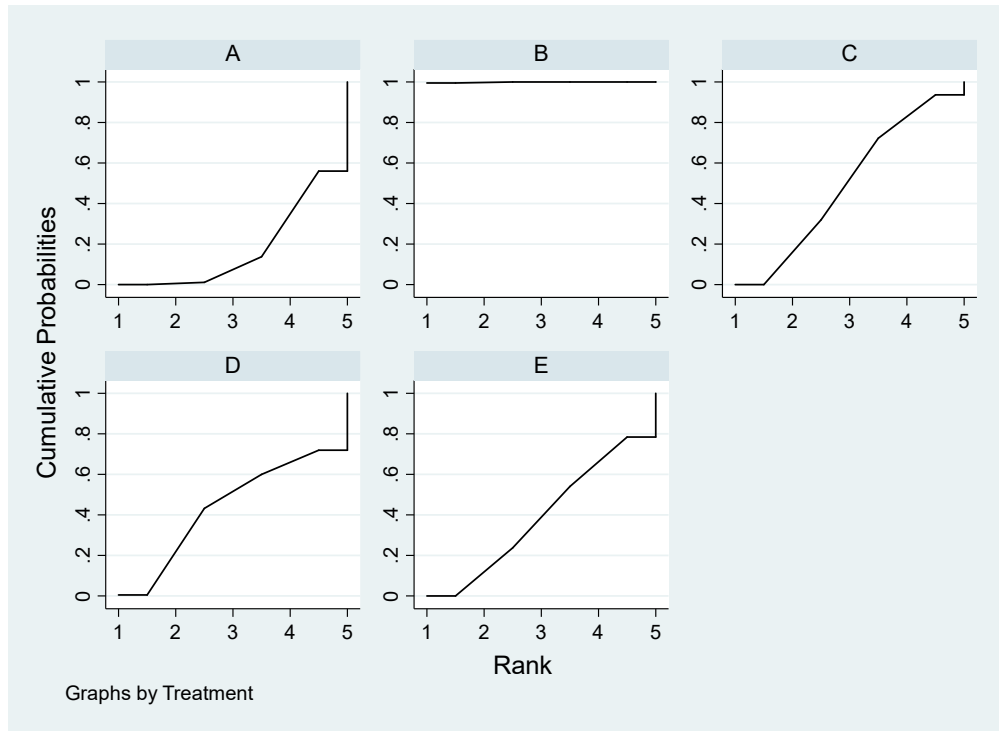

**Label:** PLA=1=A B.coagulans=2=B B.infantis=3=C L.plantarum=4=D S.boulevardii=5=E

**Table S14:** League table (**Straining**).

|                            |                    |                    |                    |            |  |
|----------------------------|--------------------|--------------------|--------------------|------------|--|
| <b>B.coagulans</b>         |                    |                    |                    |            |  |
| <b>-1.11 (-1.55,-0.66)</b> | <b>B.infantis</b>  |                    |                    |            |  |
| <b>-1.11 (-1.93,-0.29)</b> | -0.00 (-0.79,0.79) | <b>L.plantarum</b> |                    |            |  |
| <b>-1.18 (-1.71,-0.64)</b> | -0.07 (-0.56,0.43) | -0.07 (-0.92,0.78) | <b>S.boulardii</b> |            |  |
| <b>-1.29 (-1.63,-0.94)</b> | -0.18 (-0.46,0.10) | -0.18 (-0.92,0.56) | -0.11 (-0.52,0.30) | <b>PLA</b> |  |

**Figure S13: Forest plot and the global inconsistency test result (Strain scores: probiotics+length)**  
 ( $\chi^2=6.52$ ,  $p=0.0107$ )

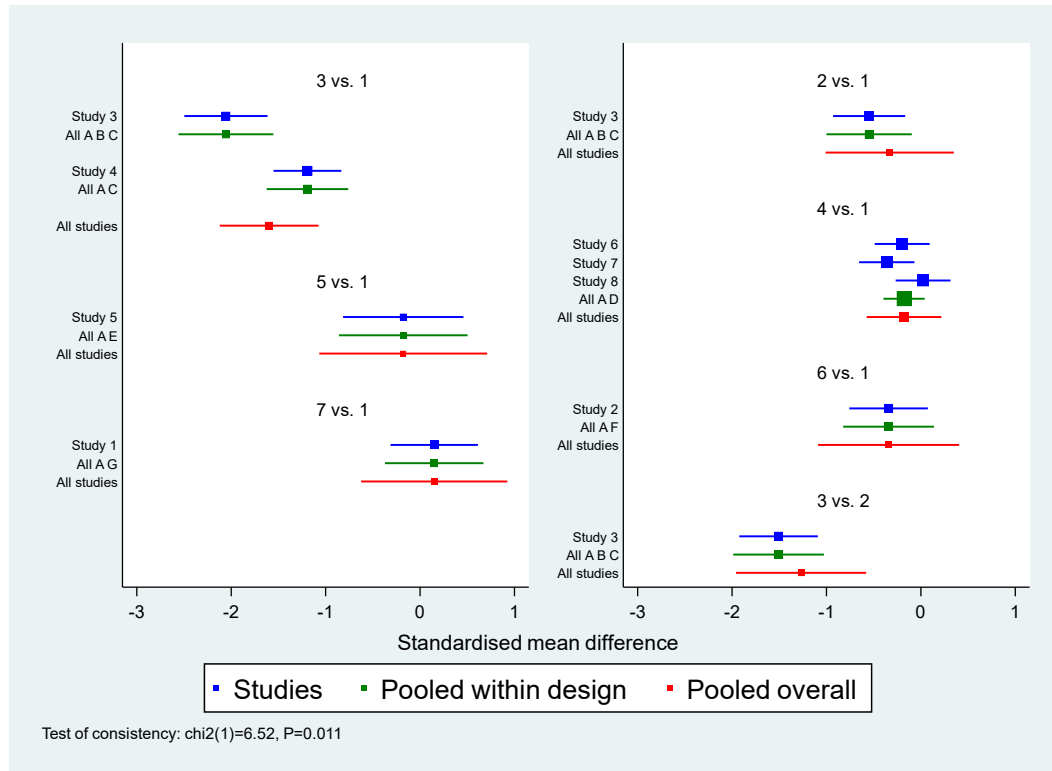

**Label:** *PLA*=1=A   *B.coagulans*(4w)=2=B   *B.coagulans*(8w)=3=C   *B.infantis*(4w)=4=D   *L.plantarum*(3w)=5=E  
*S.bouardii*(4w)=6=F   *S.bouardii*(6w)=7=G

**Table S15: Local inconsistency test (Strain scores: probiotics+length)**

| Side  | Direct    |           | Indirect |           | Difference |           | P> z  | tau      |
|-------|-----------|-----------|----------|-----------|------------|-----------|-------|----------|
|       | Coef.     | Std. Err. | Coef.    | Std. Err. | Coef.      | Std. Err. |       |          |
| A B * | -.5482431 | .2303674  | 1.177715 | .6267571  | -1.725958  | .6760362  | 0.011 | .1227094 |
| A C   | .         | .         | .        | .         | .          | .         | .     | .        |
| A D   | .         | .         | .        | .         | .          | .         | .     | .        |
| A E   | .         | .         | .        | .         | .          | .         | .     | .        |
| A F   | .         | .         | .        | .         | .          | .         | .     | .        |
| A G   | .         | .         | .        | .         | .          | .         | .     | .        |
| B C * | -1.507669 | .2450861  | .218289  | .6097797  | -1.725958  | .676037   | 0.011 | .1227094 |

**Label:** *PLA*=1=*A* *B.coagulans*(4w)=2=*B* *B.coagulans*(8w)=3=*C* *B.infantis*(4w)=4=*D* *L.plantarum*(3w)=5=*E*  
*S.bouardii*(4w)=6=*F* *S.bouardii*(6w)=7=*G*

**Table S16: Result of SUCRA analysis: MeanRank table (Strain scores: probiotics+length)**

| +-----+  |       |        |          |
|----------|-------|--------|----------|
| Treatm~t | SUCRA | PrBest | MeanRank |
| A        | 25.8  | 0.0    | 5.4      |
| B        | 56.2  | 0.0    | 3.6      |
| C        | 99.9  | 99.3   | 1.0      |
| D        | 46.9  | 0.0    | 4.2      |
| E        | 43.6  | 0.2    | 4.4      |
| F        | 56.9  | 0.4    | 3.6      |
| G        | 20.7  | 0.0    | 5.8      |

**Label:** *PLA*=1=*A*   *B.coagulans*(4w)=2=*B*   *B.coagulans*(8w)=3=*C*   *B.infantis*(4w)=4=*D*   *L.plantarum*(3w)=5=*E*  
*S.bouardii*(4w)=6=*F*   *S.bouardii*(6w)=7=*G*

**Figure S14: Result of SUCRA analysis: MeanRank figure (Strain scores: probiotics+length)**

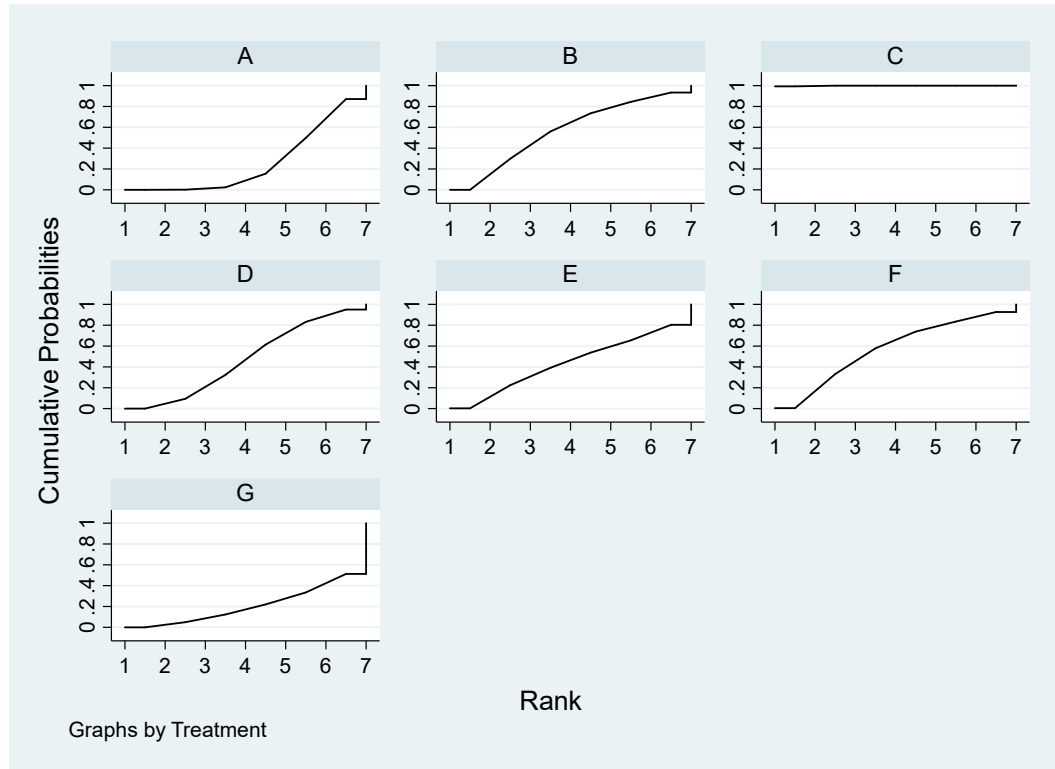

**Label:** *PLA*=1=*A*   *B.coagulans*(4w)=2=*B*   *B.coagulans*(8w)=3=*C*   *B.infantis*(4w)=4=*D*   *L.plantarum*(3w)=5=*E*  
*S.boulaardii*(4w)=6=*F*   *S.boulaardii*(6w)=7=*G*

**Table S17: league table (Strain scores: probiotics+length)**

*B.coagulans*(8w)

|                            |                                                                                                                          |
|----------------------------|--------------------------------------------------------------------------------------------------------------------------|
| <b>-1.26 (-2.17,-0.34)</b> | <i>S.boulevardii</i> (4w)                                                                                                |
| <b>-1.27 (-1.96,-0.58)</b> | -0.01 (-1.02,1.00) <i>B.coagulans</i> (4w)                                                                               |
| <b>-1.42 (-2.08,-0.76)</b> | -0.16 (-1.01,0.68) -0.15 (-0.94,0.63) <i>B.infantis</i> (4w)                                                             |
| <b>-1.42 (-2.45,-0.39)</b> | -0.16 (-1.33,1.00) -0.15 (-1.27,0.97) -0.00 (-0.97,0.97) <i>L.plantarum</i> (3w)                                         |
| <b>-1.60 (-2.12,-1.08)</b> | -0.34 (-1.09,0.41) -0.33 (-1.01,0.35) -0.18 (-0.57,0.22) -0.18 (-1.07,0.71) PLA                                          |
| <b>-1.75 (-2.68,-0.81)</b> | -0.49 (-1.57,0.58) -0.48 (-1.51,0.55) -0.33 (-1.20,0.54) -0.33 (-1.51,0.85) -0.15 (-0.92,0.62) <i>S.boulevardii</i> (6w) |

**Label:** PLA=1=A *B.coagulans*(4w)=2=B *B.coagulans*(8w)=3=C *B.infantis*(4w)=4=D *L.plantarum*(3w)=5=E  
*S.boulevardii*(4w)=6=F *S.boulevardii*(6w)=7=G



**Table S18: Result of SUCRA analysis: MeanRank table (QOL)**

| Treatm~t | SUCRA | PrBest | MeanRank |
|----------|-------|--------|----------|
| A        | 30.3  | 0.5    | 3.8      |
| B        | 40.8  | 9.7    | 3.4      |
| C        | 44.0  | 6.9    | 3.2      |
| D        | 79.8  | 59.8   | 1.8      |
| E        | 55.2  | 23.1   | 2.8      |

**Label:** PLA=1=A C.butyrlicum=2=B L.acidophilus=3=C L.plantarum=4=D S.boulardii=5=E

**Figure S15: Result of SUCRA analysis: MeanRank figure (QOL)**

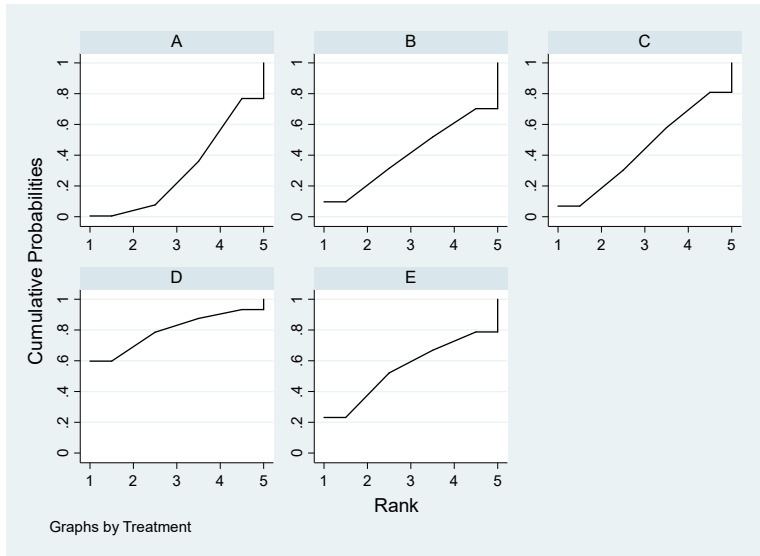

**Label:** PLA=1=A C.butyrlicum=2=B L.acidophilus=3=C L.plantarum=4=D S.boulardii=5=E

**Table S19: league table (QOL)**

|                    |                    |                      |                    |            |
|--------------------|--------------------|----------------------|--------------------|------------|
| <b>L.plantarum</b> |                    |                      |                    |            |
| 0.20 (-0.54,0.93)  | <b>S.boulardii</b> |                      |                    |            |
| 0.27 (-0.33,0.88)  | 0.08 (-0.49,0.64)  | <b>L.acidophilus</b> |                    |            |
| 0.28 (-0.39,0.96)  | 0.09 (-0.55,0.72)  | 0.01 (-0.46,0.49)    | <b>C.butyricum</b> |            |
| 0.33 (-0.22,0.87)  | 0.13 (-0.37,0.63)  | 0.05 (-0.21,0.32)    | 0.04 (-0.35,0.44)  | <b>PLA</b> |

**Table S20: Result of SUCRA analysis: MeanRank table (Adverse events)**

| Treatment | SUCRA | PrBest | MeanRank |
|-----------|-------|--------|----------|
| A         | 68.8  | 0.0    | 3.5      |
| B         | 33.3  | 0.0    | 6.3      |
| C         | 20.6  | 0.9    | 7.4      |
| D         | 19.2  | 1.6    | 7.5      |
| E         | 51.2  | 0.7    | 4.9      |
| F         | 98.1  | 85.8   | 1.2      |
| G         | 62.2  | 9.2    | 4.0      |
| H         | 50.2  | 1.9    | 5.0      |
| I         | 46.4  | 0.0    | 5.3      |

**Label:** PLA=1=A B.bifidum=2=B B.longum=3=C C.butyricum=4=D E.coli=5=E L.acidophilus=6=F L.reuteri=7=G  
 S.boulardii=8=H S.cerevisiae=9=I

**Figure S16: Result of SUCRA analysis: MeanRank figure (Adverse events)**

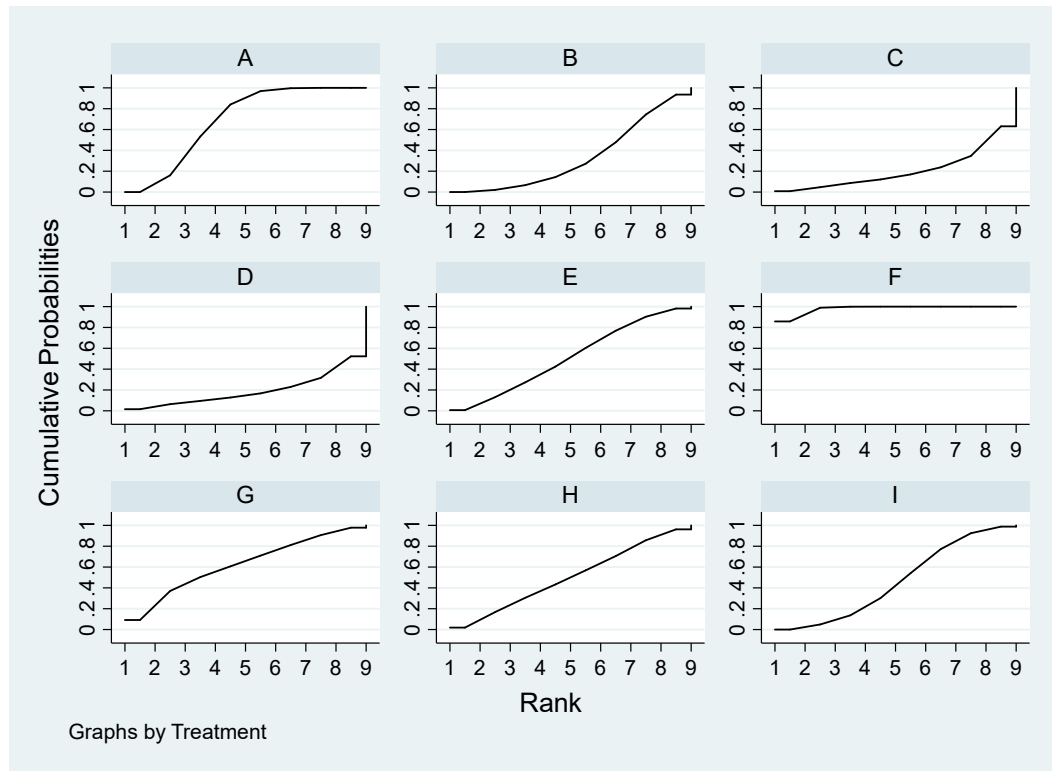

**Label:** PLA=1=A B.bifidum=2=B B.longum=3=C C.butyricum=4=D E.coli=5=E L.acidophilus=6=F L.reuteri=7=G  
S.bouardii=8=H S.cerevisiae=9=I

**Table S21: league table (Adverse events)**

|                      |             |                  |               |                   |                     |                  |                 |                    |
|----------------------|-------------|------------------|---------------|-------------------|---------------------|------------------|-----------------|--------------------|
| <b>L.acidophilus</b> |             |                  |               |                   |                     |                  |                 |                    |
| <b>0.47</b>          |             |                  |               |                   |                     |                  |                 |                    |
| <b>(0.32,0.67)</b>   | <b>PLA</b>  |                  |               |                   |                     |                  |                 |                    |
| 0.47                 | 1.00        |                  |               |                   |                     |                  |                 |                    |
| (0.15,1.44)          | (0.34,2.91) | <b>L.reuteri</b> |               |                   |                     |                  |                 |                    |
| <b>0.38</b>          | 0.82        | 0.82             |               |                   |                     |                  |                 |                    |
| <b>(0.17,0.85)</b>   | (0.40,1.68) | (0.23,2.96)      | <b>E.coli</b> |                   |                     |                  |                 |                    |
| <b>0.37</b>          | 0.79        | 0.79             | 0.97          |                   |                     |                  |                 |                    |
| <b>(0.14,0.97)</b>   | (0.33,1.94) | (0.20,3.20)      | (0.31,3.05)   | <b>S.bouardii</b> |                     |                  |                 |                    |
| <b>0.35</b>          | 0.76        | 0.76             | 0.92          | 0.95              |                     |                  |                 |                    |
| <b>(0.19,0.65)</b>   | (0.46,1.24) | (0.23,2.45)      | (0.39,2.21)   | (0.34,2.64)       | <b>S.cerevisiae</b> |                  |                 |                    |
| <b>0.29</b>          | 0.62        | 0.62             | 0.76          | 0.78              | 0.82                |                  |                 |                    |
| <b>(0.14,0.60)</b>   | (0.33,1.17) | (0.18,2.14)      | (0.29,1.97)   | (0.26,2.33)       | (0.37,1.82)         | <b>B.bifidum</b> |                 |                    |
| <b>0.18</b>          | 0.39        | 0.39             | 0.48          | 0.49              | 0.51                | 0.63             |                 |                    |
| <b>(0.04,0.76)</b>   | (0.10,1.56) | (0.07,2.24)      | (0.10,2.27)   | (0.09,2.55)       | (0.12,2.24)         | (0.14,2.89)      | <b>B.longum</b> |                    |
| <b>0.17</b>          | 0.35        | 0.35             | 0.43          | 0.45              | 0.47                | 0.57             | 0.91            |                    |
| <b>(0.03,0.88)</b>   | (0.07,1.80) | (0.05,2.48)      | (0.07,2.56)   | (0.07,2.85)       | (0.09,2.56)         | (0.10,3.28)      | (0.11,7.74)     | <b>C.butyricum</b> |

**Figure S17: Result of SUCRA analysis: MeanRank figure (global symptom scores: *B. coagulans* vs. Probiotic combinations)**

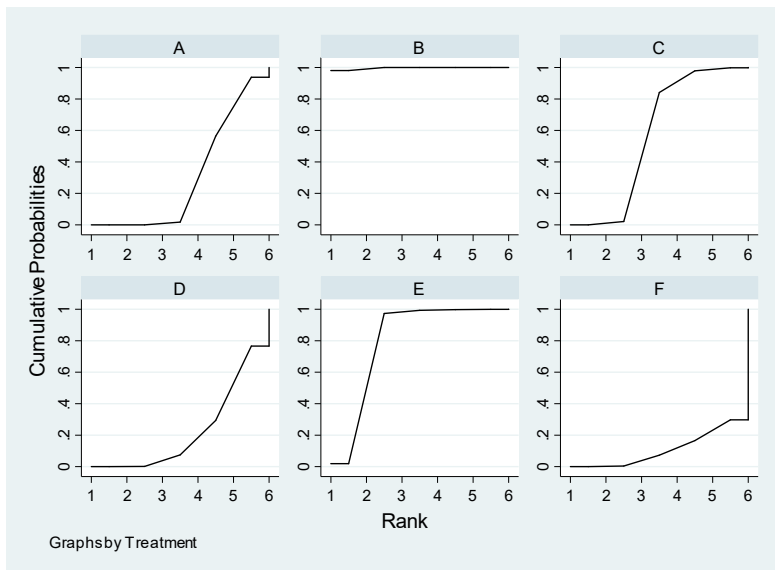

Labels: PLA=A    *B. coagulans*=B    1B1L1S=C    1B2L=D    1B2L1S=E    3B4L1S=F

**Table S22: league table (global symptom scores: *B. coagulans* vs. Probiotic combinations)**

|                            |                            |                            |                           |                           |          |
|----------------------------|----------------------------|----------------------------|---------------------------|---------------------------|----------|
| <b>B</b>                   |                            |                            |                           |                           |          |
| <b>-0.90 (-1.74,-0.05)</b> | <b>E</b>                   |                            |                           |                           |          |
| <b>-1.75 (-2.14,-1.36)</b> | <b>-0.85 (-1.68,-0.03)</b> | <b>C</b>                   |                           |                           |          |
| <b>-1.99 (-2.29,-1.68)</b> | <b>-1.09 (-1.88,-0.30)</b> | <b>-0.24 (-0.48,-0.00)</b> | <b>A</b>                  |                           |          |
| <b>-2.08 (-2.58,-1.58)</b> | <b>-1.19 (-2.07,-0.30)</b> | <b>-0.34 (-0.80,0.13)</b>  | <b>-0.09 (-0.49,0.30)</b> | <b>D</b>                  |          |
| <b>-2.35 (-3.20,-1.50)</b> | <b>-1.46 (-2.57,-0.34)</b> | <b>-0.60 (-1.43,0.22)</b>  | <b>-0.36 (-1.16,0.43)</b> | <b>-0.27 (-1.16,0.62)</b> | <b>F</b> |

Labels: PLA=A    *B. coagulans*=B    1B1L1S=C    1B2L=D    1B2L1S=E    3B4L1S=F



**Figure S18: Result of SUCRA analysis: MeanRank figure (Symptom relief rate: *B. coagulans* vs. Probiotic combinations)**

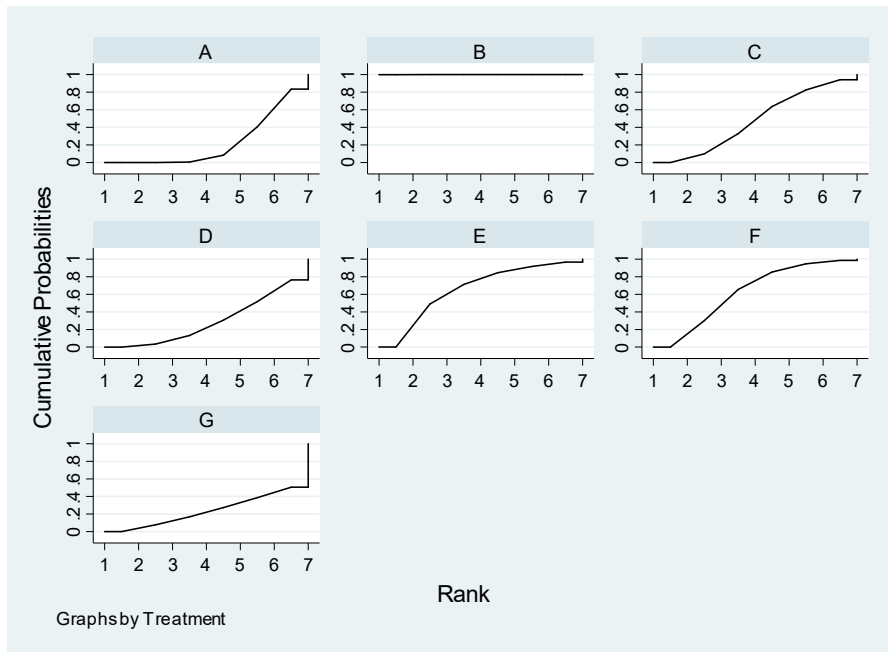

Labels: PLA=A    *B. coagulans*=B    1B1L1S=C    1B2L=D    1B2L1P=E    1B2L1S=F    3B4L1S=G

**Table S23: league table (Symptom relief rate: *B. coagulans* vs. Probiotic combinations)**

B

|                         |                   |                   |                   |                   |                    |   |
|-------------------------|-------------------|-------------------|-------------------|-------------------|--------------------|---|
| <b>3.02 (1.06,4.98)</b> | E                 |                   |                   |                   |                    |   |
| <b>3.21 (1.56,4.86)</b> | 0.19 (-1.69,2.07) | F                 |                   |                   |                    |   |
| <b>3.61 (2.03,5.19)</b> | 0.59 (-1.23,2.41) | 0.40 (-1.08,1.88) | C                 |                   |                    |   |
| <b>4.02 (2.35,5.69)</b> | 1.00 (-0.90,2.90) | 0.81 (-0.77,2.39) | 0.41 (-1.09,1.92) | D                 |                    |   |
| <b>4.33 (1.90,6.75)</b> | 1.31 (-1.28,3.89) | 1.12 (-1.25,3.48) | 0.72 (-1.60,3.03) | 0.30 (-2.07,2.68) | G                  |   |
| <b>4.10 (2.87,5.33)</b> | 1.08 (-0.44,2.61) | 0.89 (-0.21,1.99) | 0.49 (-0.50,1.49) | 0.08 (-1.05,1.21) | -0.22 (-2.31,1.87) | A |

Labels: PLA=A    *B. coagulans*=B    1B1L1S=C    1B2L=D    1B2L1P=E    1B2L1S=F    3B4L1S=G

**Figure S19: Result of SUCRA analysis: MeanRank figure (Abdominal pain: *B. coagulans* vs. Probiotic combinations)**

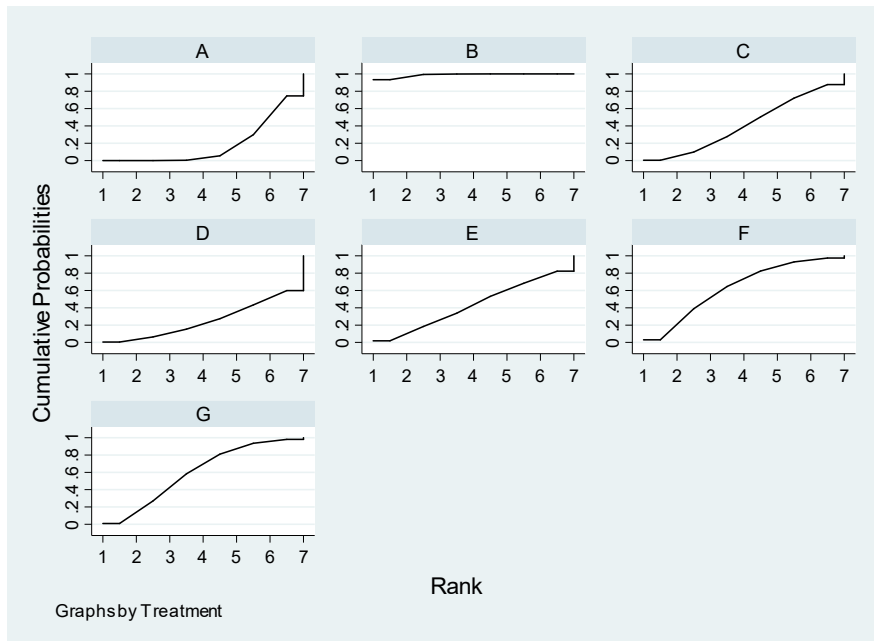

Labels: PLA=A    *B. coagulans*=B    1B1L1S=C    1B2L=D    1B2L1P=E    1B2L1S=F    3B4L1S=G

**Table S24: league table (Abdominal pain: *B. coagulans* vs. Probiotic combinations)**

B

|                            |                    |                    |                    |                    |                    |   |  |
|----------------------------|--------------------|--------------------|--------------------|--------------------|--------------------|---|--|
| -1.01 (-2.07,0.05)         | F                  |                    |                    |                    |                    |   |  |
| <b>-1.08 (-2.03,-0.13)</b> | -0.07 (-1.20,1.07) | G                  |                    |                    |                    |   |  |
| <b>-1.36 (-2.66,-0.06)</b> | -0.35 (-1.79,1.09) | -0.28 (-1.64,1.08) | E                  |                    |                    |   |  |
| <b>-1.40 (-2.43,-0.36)</b> | -0.38 (-1.59,0.82) | -0.32 (-1.43,0.79) | -0.04 (-1.46,1.39) | C                  |                    |   |  |
| <b>-1.72 (-3.01,-0.43)</b> | -0.71 (-2.14,0.72) | -0.64 (-1.99,0.71) | -0.36 (-1.98,1.25) | -0.33 (-1.74,1.08) | D                  |   |  |
| <b>-1.72 (-2.33,-1.11)</b> | -0.71 (-1.58,0.16) | -0.64 (-1.37,0.08) | -0.36 (-1.51,0.79) | -0.33 (-1.16,0.51) | -0.00 (-1.13,1.13) | A |  |

Labels: PLA=A    *B. coagulans*=B    1B1L1S=C    1B2L=D    1B2L1P=E    1B2L1S=F    3B4L1S=G

**Figure S20: Result of SUCRA analysis: MeanRank figure (Abdominal bloating: *B. coagulans* vs. Probiotic combinations)**

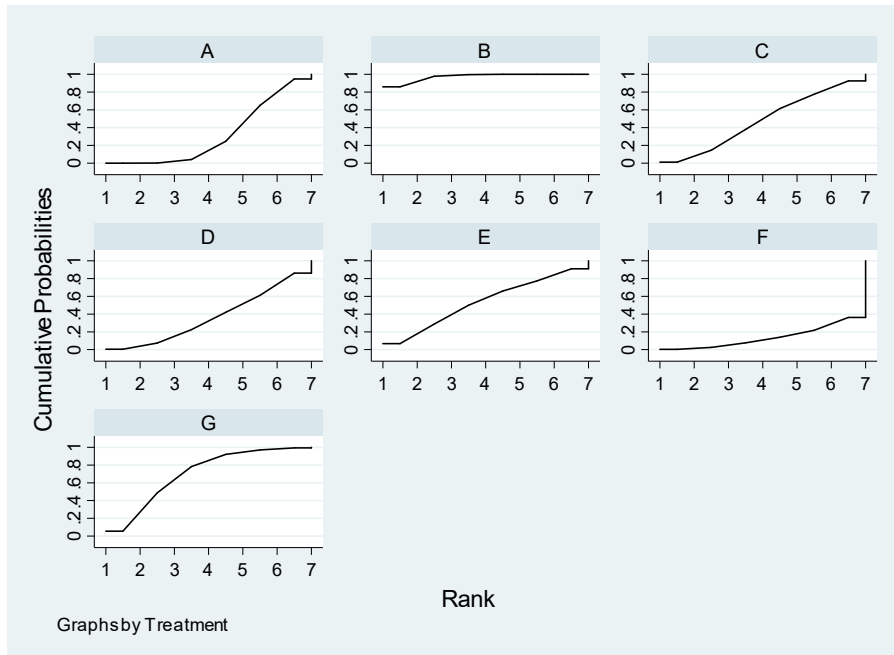

Labels: PLA=A    *B. coagulans*=B    1B1L1S=C    1B2L=D    1B2L1P=E    1B2L1S=F    3B4L1S=G

**Table S25: league table (Abdominal bloating: *B. coagulans* vs. Probiotic combinations)**

|                            |                    |                    |                    |                    |                       |          |
|----------------------------|--------------------|--------------------|--------------------|--------------------|-----------------------|----------|
| <b>B</b>                   |                    |                    |                    |                    |                       |          |
| -0.77 (-1.77,0.23)         | <b>G</b>           |                    |                    |                    |                       |          |
| -1.04 (-2.42,0.34)         | -0.27 (-1.71,1.18) | <b>E</b>           |                    |                    |                       |          |
| <b>-1.17 (-2.27,-0.08)</b> | -0.41 (-1.58,0.76) | -0.14 (-1.65,1.37) | <b>C</b>           |                    |                       |          |
| <b>-1.37 (-2.46,-0.29)</b> | -0.61 (-1.77,0.56) | -0.34 (-1.84,1.17) | -0.20 (-1.44,1.04) | <b>D</b>           |                       |          |
| <b>-1.41 (-2.05,-0.77)</b> | -0.64 (-1.41,0.12) | -0.38 (-1.60,0.85) | -0.24 (-1.12,0.65) | -0.04 (-0.91,0.84) | <b>A</b>              |          |
| <b>-1.97 (-3.48,-0.47)</b> | -1.20 (-2.77,0.36) | -0.94 (-2.77,0.90) | -0.80 (-2.42,0.83) | -0.60 (-2.22,1.02) | -0.56<br>(-1.92,0.80) | <b>F</b> |

Labels: PLA=A    *B. coagulans*=B    1B1L1S=C    1B2L=D    1B2L1P=E    1B2L1S=F    3B4L1S=G

**Table S26: league table (Abdominal pain: Comparisons of different strains of *B. coagulans*)**

*B.coagulans* MTCC5856

-0.71 (-1.65,0.23)

*B.coagulans* Unique IS2

**-1.60 (-2.71,-0.49)**

**-0.89 (-1.61,-0.17)**

*B.coagulans* LBSC

**-2.51 (-3.41,-1.62)**

**-1.80 (-2.10,-1.51)**

**-0.91 (-1.56,-0.25)**

PLA

**Table S27: league table (Abdominal bloating: Comparisons of different strains of *B. coagulans*)**

*B.coagulans* MTCC5856

-0.52 (-1.59,0.55)

*B.coagulans* Unique IS2

**-2.18 (-3.15,-1.21)**

**-1.66 (-2.11,-1.21)**

PLA

**Table S28: league table (Straining scores: Comparisons of different strains of *B. coagulans*)**

*B.coagulans* Unique IS2

-0.56 (-1.52,0.39)

*B.coagulans* LBSC

**-1.41 (-1.88,-0.95)**

**-0.85 (-1.68,-0.02)**

PLA
